# Supplementary material for: Crystal structures of DNA polymerase I capture novel intermediates in the DNA synthesis pathway
Source: eLife journal article supplement (doi:10.7554/elife.40444), 2018-10-19
Supplement: supp [file elife-40444-supp-v1.zip]

Archive with 7 entries (7 files):
- elife_poa_e40444_Figure_1_figure_supplement_3.pdf
- elife_poa_e40444_Figure_1_figure_supplement_2.ai
- elife_poa_e40444_Transparent_Reporting_File.pdf
- elife_poa_e40444_Figure_1_figure_supplement_3.pdf
- elife_poa_e40444_Supplementary_FIle_1.docx
- elife_poa_e40444_Figure_1_figure_supplement_5.ai
- elife_poa_e40444_Figure_1_figure_supplement_1.ai
