# Supplementary figures and images for: Crystal structures of DNA polymerase I capture novel intermediates in the DNA synthesis pathway
Source: eLife journal article supplement (doi:10.7554/elife.40444), 2018-10-19

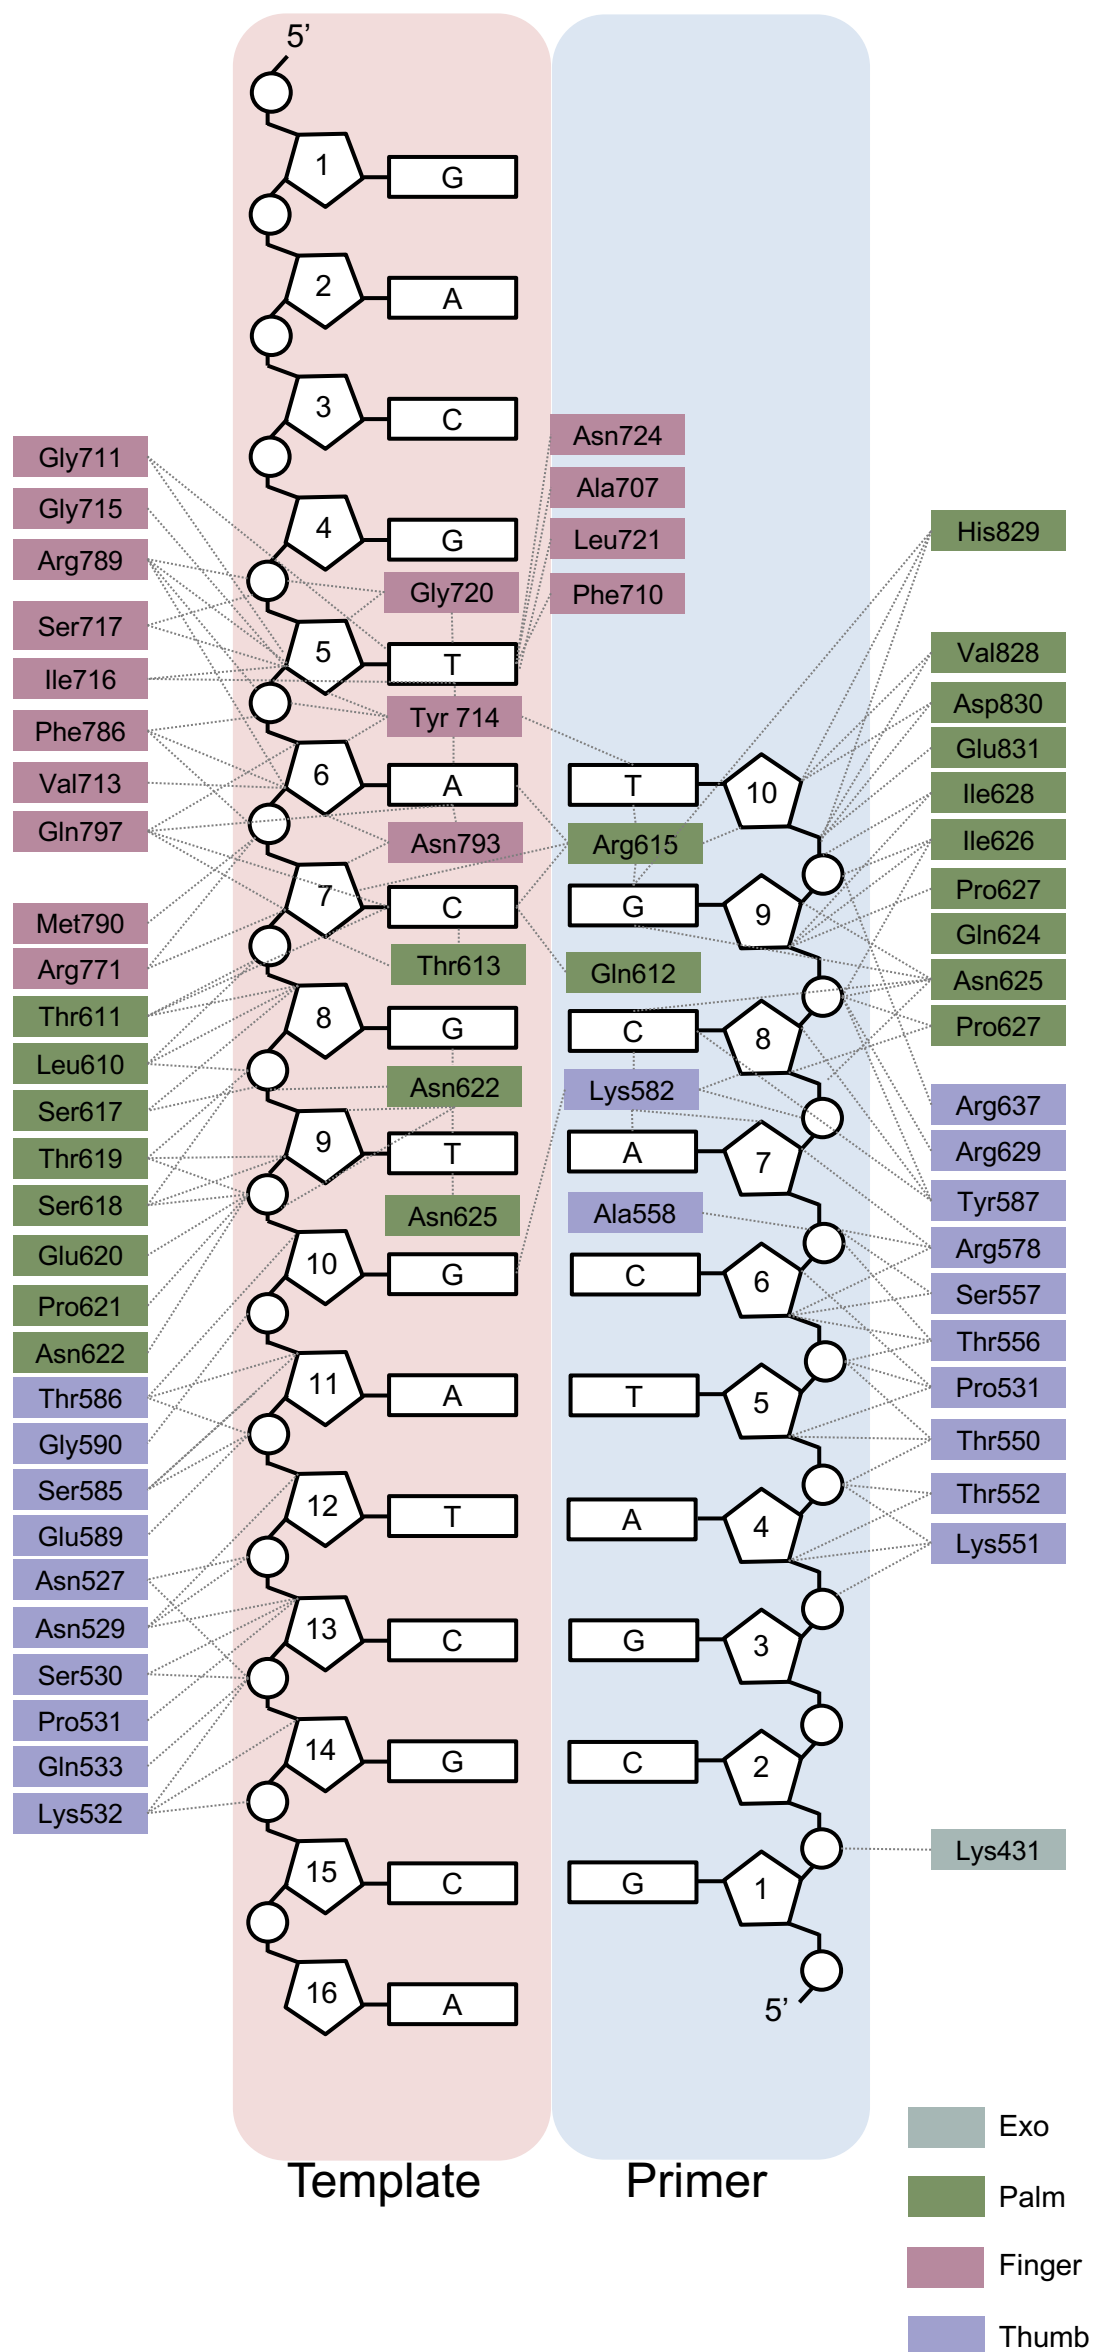

Supplement: supp [file elife-40444-supp-v1.zip › elife_poa_e40444_Figure_1_figure_supplement_3.pdf]

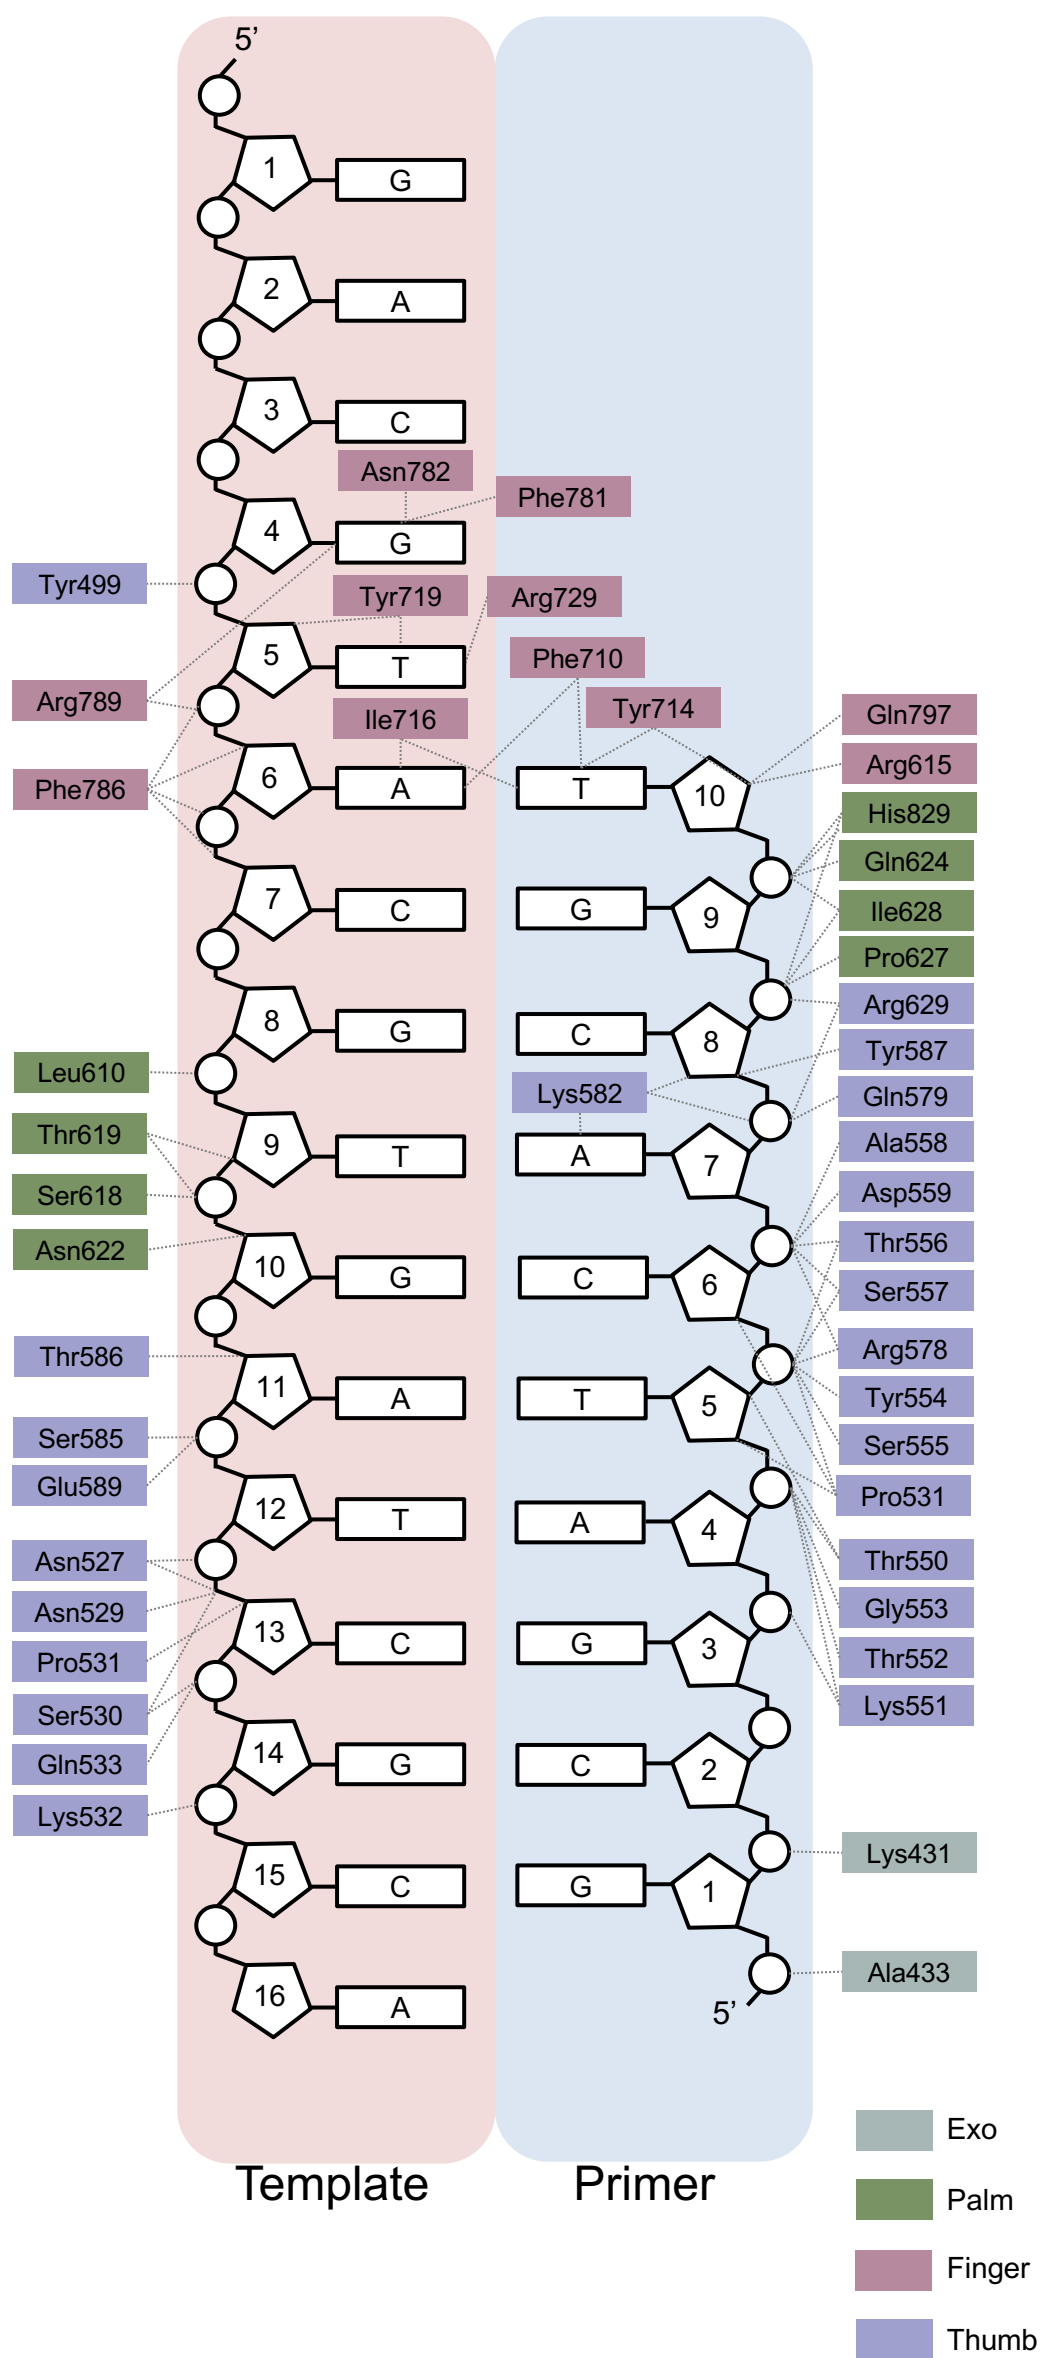

Supplement: supp [file elife-40444-supp-v1.zip › elife_poa_e40444_Figure_1_figure_supplement_3.pdf]
